# Supplementary material
Source: MDPI journal article supplement (https://www.mdpi.com/2071-1050/15/8/6690)
Supplement: s1 [file s1]

Table S1. Results of Two-way ANOVA for DOC

| Parameter     | Sum of Squares | Df | Mean Square | F-value  | P-value  |
|---------------|----------------|----|-------------|----------|----------|
| Temperature   | 25208307       | 11 | 2291664     | 119.0517 | 5.64E-29 |
| Mixing ratios | 7799015        | 4  | 1949754     | 101.2895 | 1.32E-21 |
| Residual      | 846970         | 44 | 19249.32    |          |          |
| Total         | 33854292       | 59 |             |          |          |

Table S2. Results of Two-way ANOVA for pH

| Parameter     | Sum of Squares | Df | Mean Square | F-value  | P-value  |
|---------------|----------------|----|-------------|----------|----------|
| Temperature   | 13.76357       | 11 | 1.251234    | 45.03136 | 2.79E-20 |
| Mixing ratios | 0.242983       | 4  | 0.060746    | 2.186216 | 0.086142 |
| Residual      | 1.222577       | 44 | 0.027786    |          |          |
| Total         | 15.22913       | 59 |             |          |          |

Table S3. Results of Two-way ANOVA for TAN

| Parameter     | Sum of Squares | Df | Mean Square | F-value  | P-value  |
|---------------|----------------|----|-------------|----------|----------|
| Temperature   | 1732593        | 11 | 157508.4    | 65.38784 | 1.5E-23  |
| Mixing ratios | 41929.64       | 4  | 10482.41    | 4.351654 | 0.004729 |
| Residual      | 105988.7       | 44 | 2408.834    |          |          |
| Total         | 1880511        | 59 |             |          |          |

Table S4. Results of Two-way ANOVA for FAN

| Parameter     | Sum of Squares | Df | Mean Square | F-value  | P-value  |
|---------------|----------------|----|-------------|----------|----------|
| Temperature   | 744145.3       | 11 | 67649.58    | 23.21904 | 8.55E-15 |
| Mixing ratios | 40856.43       | 4  | 10214.11    | 3.505739 | 0.014364 |
| Residual      | 128195.7       | 44 | 2913.539    |          |          |
| Total         | 913197.5       | 59 |             |          |          |

Table S5. Results of Two-way ANOVA for cumulative methane yield

| Parameter     | Sum of Squares | Df | Mean Square | F-value  | P-value  |
|---------------|----------------|----|-------------|----------|----------|
| Temperature   | 63066.14       | 13 | 4851.242    | 28.62172 | 4.01E-19 |
| Mixing ratios | 22921.4        | 4  | 5730.351    | 33.80835 | 6.77E-14 |
| Residual      | 8813.748       | 52 | 169.4951    |          |          |
| Total         | 94801.3        | 69 |             |          |          |

Table S6. Results of Two-way ANOVA for NCST

| Parameter     | Sum of Squares | Df | Mean Square | F-value  | P-value  |
|---------------|----------------|----|-------------|----------|----------|
| Temperature   | 240.0235       | 11 | 21.82032    | 11.17419 | 1.75E-09 |
| Mixing ratios | 141.085        | 4  | 35.27125    | 18.06243 | 7.65E-09 |
| Residual      | 85.92064       | 44 | 1.952742    |          |          |
| Total         | 467.0291       | 59 |             |          |          |

Table S7. Results of Two-way ANOVA for TS of sediment

| Parameter     | Sum of Squares | Df | Mean Square | F-value  | P-value  |
|---------------|----------------|----|-------------|----------|----------|
| Temperature   | 1.731228       | 11 | 0.157384    | 0.612302 | 0.808237 |
| Mixing ratios | 55.79998       | 4  | 13.95       | 54.27226 | 1.87E-16 |
| Residual      | 11.30964       | 44 | 0.257037    |          |          |
| Total         | 68.84085       | 59 |             |          |          |

Table S8. Results of Two-way ANOVA for ultimate methane yield

| Parameter     | Sum of Squares | Df | Mean Square | F-value  | P-value  |
|---------------|----------------|----|-------------|----------|----------|
| Temperature   | 6.669336       | 1  | 6.669336    | 0.051403 | 0.831755 |
| Mixing ratios | 5621.116       | 4  | 1405.279    | 10.83098 | 0.020225 |
| Residual      | 518.9849       | 4  | 129.7462    |          |          |
| Total         | 6146.77        | 9  |             |          |          |

Table S9. Results of Two-way ANOVA for maximum methane production rate

| Parameter     | Sum of Squares | Df | Mean Square | F-value  | P-value  |
|---------------|----------------|----|-------------|----------|----------|
| Temperature   | 24.70115       | 1  | 24.70115    | 8.807865 | 0.041234 |
| Mixing ratios | 25.1539        | 4  | 6.288475    | 2.242326 | 0.226694 |
| Residual      | 11.21777       | 4  | 2.804443    |          |          |
| Total         | 61.07282       | 9  |             |          |          |

Table S10. Results of Two-way ANOVA for lag phase

| Parameter     | Sum of Squares | Df | Mean Square | F-value  | P-value  |
|---------------|----------------|----|-------------|----------|----------|
| Temperature   | 5.256105       | 1  | 5.256105    | 1.050167 | 0.363395 |
| Mixing ratios | 80.57105       | 4  | 20.14276    | 4.024514 | 0.103065 |
| Residual      | 20.02007       | 4  | 5.005017    |          |          |
| Total         | 105.8472       | 9  |             |          |          |
